# Supplementary material
Source: bioRxiv or medRxiv preprint supplement (https://www.biorxiv.org/content/biorxiv/early/2021/12/11/2021.12.10.472173.1/DC1/embed/media-1.pdf)
Supplement: Supplementary file [file media-1.pdf]

**Supplementary materials for**

**Manipulating Histone Acetylation Leads to Adverse Effects in Hemangiosarcoma Cells**

Tamami Suzuki <sup>a</sup>, Keisuke Aoshima <sup>a,\*</sup>, Jumpei Yamazaki <sup>b</sup>, Atsushi Kobayashi <sup>a</sup>, Takashi Kimura <sup>a</sup>

<sup>a</sup> *Laboratory of Comparative Pathology, Department of Clinical Sciences, Faculty of Veterinary Medicine, Hokkaido University, Sapporo, Hokkaido, 060-0818, Japan*

<sup>b</sup> *Translational Research Unit, Veterinary Teaching Hospital, Faculty of Veterinary Medicine, Hokkaido University, Sapporo, Hokkaido, 060-0818, Japan*

\* Corresponding author. Tel.: +81 11 7065193.

E-mail address: k-aoshima@vetmed.hokudai.ac.jp (Keisuke Aoshima).

**A**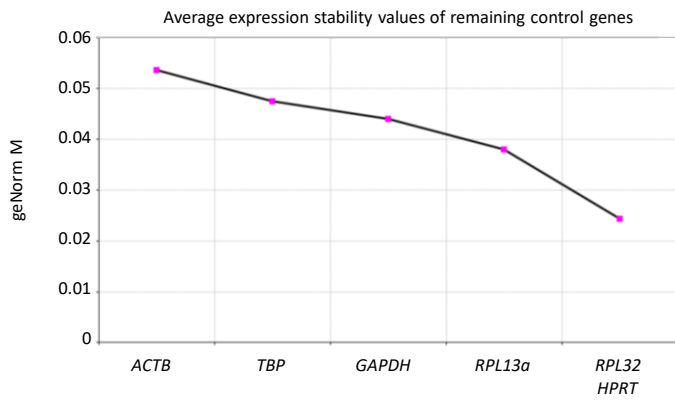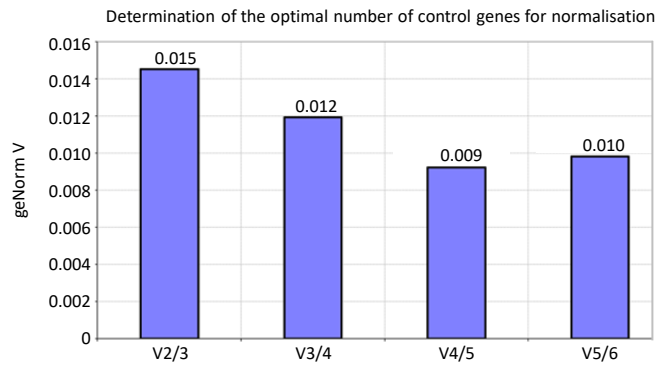**B**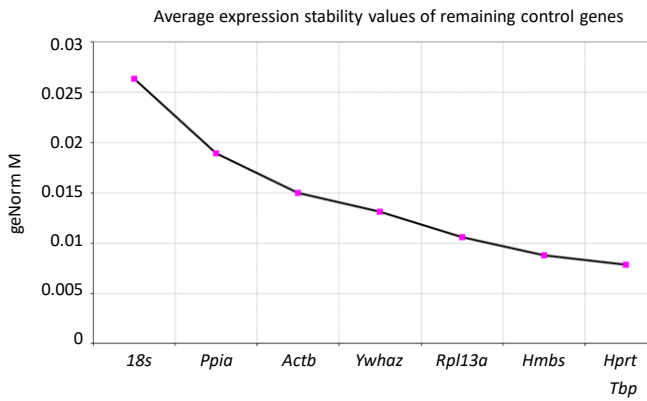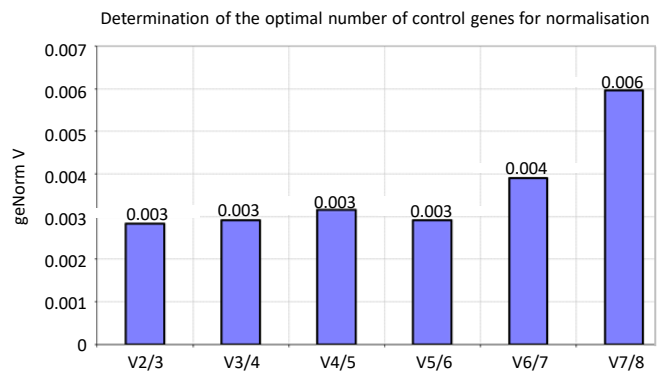**Supplementary figure 1.****geNorm analysis to determine appropriate reference gene sets.**

(A, B) (Left) Average expression stability values (geNorm M) of candidate genes. The gene with the lowest M value has the most stable expression in dogs (A) and mice (B). (Right) Determination of optimal number of control genes for geometric normalisation for dogs (A) and mice (B). To determine the optimal number of reference genes, 0.15 V value was used as the cut-off value as Vandesompele et al. (2002) recommended.

**A**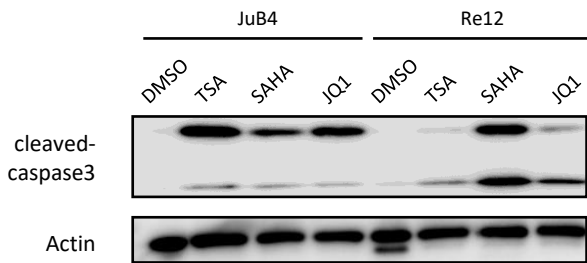**B**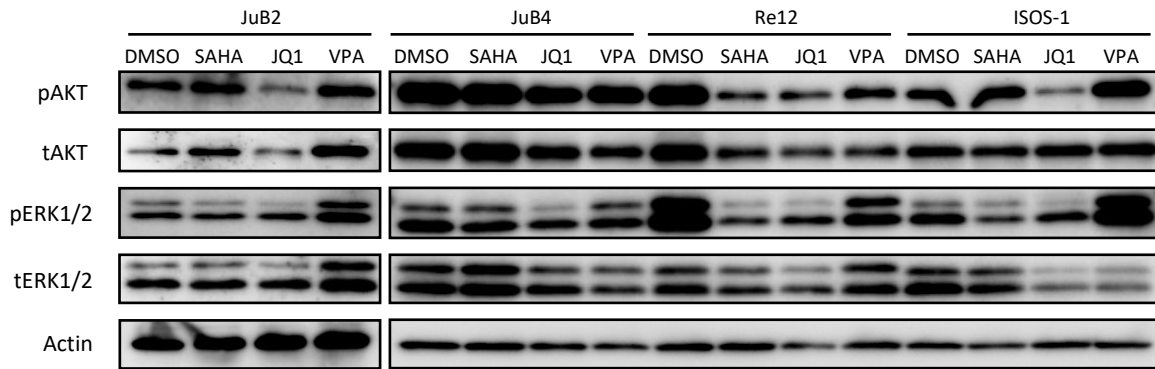

### Supplementary figure 2.

(A) Uncropped images of western blot analysis for cleaved caspase 3 and Actin in JuB4 and Re12 treated with DMSO, TSA, SAHA and JQ1. TSA: Trichostatin A. (B) Western blot analysis for phosphorylated and total AKT and ERK expression in canine and murine HSA cell lines treated with DMSO, SAHA, JQ1 or VPA.

**A**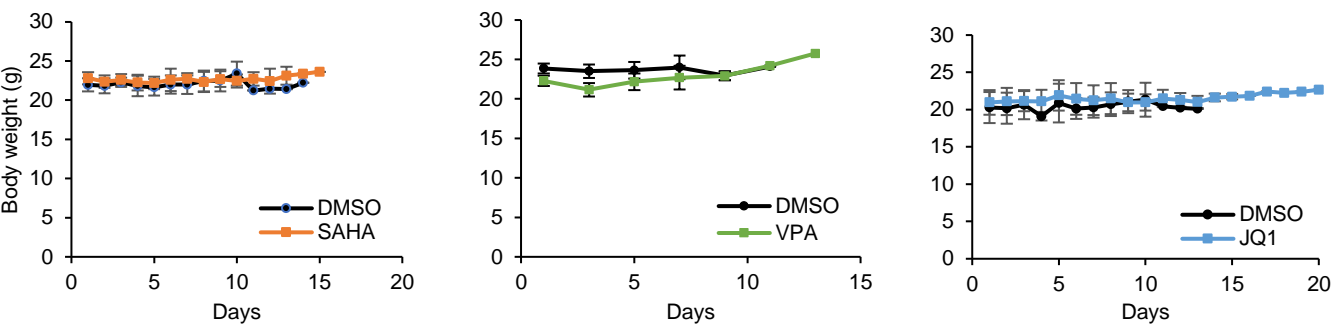**B**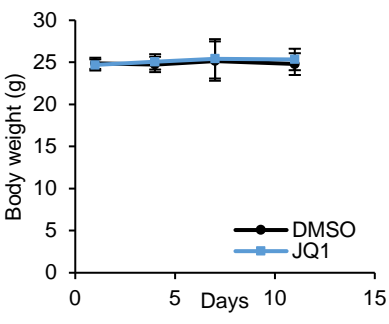

**Supplementary Figure 3.**

**Average body weight of mice in *in vivo* study**

(A) Average body weight of Balb/c mice treated with DMSO, SAHA, VPA or JQ1 after starting treatments. (B) Average body weight of KSN/Slc mice treated with DMSO or JQ1 after starting treatments.

| Case Number | Breed                 | Age | Sex    | Location |
|-------------|-----------------------|-----|--------|----------|
| 1           | Miniature Dachshund   | 10y | F Spay | Spleen   |
| 2           | Jack Russell Terrier  | 9y  | M Cast | Spleen   |
| 3           | Jack Russell Terrier  | 7y  | F Spay | Spleen   |
| 4           | Miniature Dachshund   | 14y | M Cast | Spleen   |
| 5           | French Bulldog        | 7y  | M Cast | Spleen   |
| 6           | Miniature Dachshund   | 9y  | F      | Spleen   |
| 7           | Miniature Schnauzer   | 11y | M      | Spleen   |
| 8           | Miniature Dachshund   | 10y | F      | Spleen   |
| 9           | Flat-coated retriever | 11y | F      | Spleen   |
| 10          | Golden Retriever      | 9y  | M      | Liver    |

\*F: female, M: male, Spay: spayed, Cast: castrated

**Supplementary Table 1.** Case information

| Protein Name               | Maker                          | Host   | Dilution | Catalog Number |
|----------------------------|--------------------------------|--------|----------|----------------|
| Acetylated Histone H2B     | Santa Cruz Biotechnology, Inc. | Mouse  | 1:500    | sc-515937      |
| Acetylated Histone H3      | Active Motif                   | Rabbit | 1:5000   | 39040          |
| Acetylated Histone H4      | Santa Cruz Biotechnology, Inc. | Mouse  | 1:500    | sc-377520      |
| Cleaved-caspase 3          | Cell Signaling Technology      | Rabbit | 1:1000   | 9661S          |
| pAKT                       | Cell Signaling Technology      | Rabbit | 1:1000   | 4060           |
| tAKT                       | Cell Signaling Technology      | Rabbit | 1:1000   | 4691           |
| pERK1/2                    | Cell Signaling Technology      | Rabbit | 1:1000   | 4370S          |
| tERK1/2                    | Cell Signaling Technology      | Rabbit | 1:1000   | 4695S          |
| LC3                        | MBL                            | Rabbit | 1:1000   | PM036          |
| Actin                      | Sigma-Aldrich                  | Mouse  | 1:10000  | MAB1501        |
| H3                         | MAB Institute                  | Mouse  | 1:10000  | MABI0001-20    |
| Goat anti-Mouse IgG (H+L)  | Thermo Fisher Scientific       | Goat   | 1:10000  | G21040         |
| Goat anti-Rabbit IgG (H+L) | Thermo Fisher Scientific       | Goat   | 1:10000  | G21234         |

**Supplementary Table 2.** Antibody list

| Species       | Target                 | Sequence (Forward)           | Sequence (Forward)             | Gene ID                |
|---------------|------------------------|------------------------------|--------------------------------|------------------------|
| Canine        | <i>OAS1</i>            | TGTGCGGGTGTCTAAAGTTG         | TGAACTGTCTCGTTTCTCG            | ENSCAFG<br>00000023556 |
|               | <i>OAS2</i>            | TGACCCAGATCCAGAAAACC         | CCATTCCGGTAGCGTCTTTTG          | ENSCAFG<br>00000023107 |
|               | <i>CXCL8</i>           | GGCAGCTTTTGTCTTTCTG          | ACACTGGCATCGAAGTTCTG           | ENSCAFG<br>00000003029 |
|               | <i>CXCL12</i>          | AGCCAACGTCAAGCATCTCA         | TCAATGCACACCTGTCTGCT           | ENSCAFG<br>00000007026 |
|               | <i>IL6</i>             | TCGGCAAAATCTCTGCACTG         | TTTCTGCCAGTGCCTCTTTG           | ENSCAFG<br>00000002733 |
|               | <i>RPL32</i>           | TGGTTACAGGAGCAACAAGAAA       | GCACATCAGCAGCACTTCA            | ENSCAFG<br>00000004871 |
|               | <i>HPRT1</i>           | CACTGGGAAAACAATGCAGA         | ACAAAGTCSGGTTTATAGCCAACA       | ENSCAFG<br>00000018870 |
|               | <i>GAPDH</i>           | ATTCCACGGCAGTCAAG            | TACTCAGCACCAGCATCACC           | ENSCAFG<br>00000015077 |
|               | <i>TBP</i>             | ATAAGAGAGCCCCGAACCAC         | TTCACATCACAGTCCCCAC            | ENSCAFG<br>00000004119 |
| <i>RPL13A</i> | GCCGGAAGGTTGTAGTCGT    | GGAGGAAGGCCAGTAATTC          | ENSCAFG<br>00000029892         |                        |
| Mouse         | <i>Atg9a</i>           | ATCACCTTGGCACCACATTG         | TGGTGAAGGCAACCACAAAAG          | ENSMUSG<br>00000033124 |
|               | <i>Atg13</i>           | ATTTGCACCCGCTCATCATC         | AGGGCCTTCTTTGCTTCATG           | ENSMUSG<br>00000027244 |
|               | <i>Lamp1</i>           | AGTCTTGTTGGCGTTCAG           | AGGCAATGCATTACGTGAGC           | ENSMUSG<br>00000031447 |
|               | <i>Ulk1</i>            | AAACATCGTGGCGCTGTATG         | TTCACTCAGTGTGCGCATAG           | ENSMUSG<br>00000029512 |
|               | <i>Ccne1</i>           | AAGCCCAAGCAAAGAAAGCC         | TGGCAGGTTTGGTCATTCTG           | ENSMUSG<br>00000002068 |
|               | <i>Cdk6</i>            | AAGCTGCTGACCAATTGTGC         | ATACGCATGCACACACTC             | ENSMUSG<br>00000040274 |
|               | <i>Gmn</i>             | AGGAGAACGCTGAAGATGATCC       | TGCTAGCTGGTCATCCCAAAG          | ENSMUSG<br>00000006715 |
|               | <i>Mcm3</i>            | CGTTCCAAGGATGTCTTTGAGC       | ATGTGGCTGCCGTTTCAAG            | ENSMUSG<br>00000041859 |
|               | <i>Il6</i>             | TACCACTTACAAGTCGGAGGC        | CTGCAAGTGCATCATCGTTGTTT        | ENSMUSG<br>00000025746 |
|               | <i>Cxcl1</i>           | CAAACCGAAGTCATAGCCACAC       | TTTCTCCGTTACTTGGGGACAC         | ENSMUSG<br>00000029380 |
|               | <i>Ccl2</i>            | TTTCCACAACCACCTCAAGC         | TAAAGGCATCACAGTCCGAGTC         | ENSMUSG<br>00000035385 |
|               | <i>Ccl7</i>            | AAAACCCCAACTCAAAGCC          | ACAGCGGTGAGGAATTTTGC           | ENSMUSG<br>00000035373 |
|               | <i>Oas1a</i>           | AAGCACTGGTACCAACTGTG         | AGGCAAAGACAGTGAGCAAC           | ENSMUSG<br>00000052776 |
|               | <i>Oas2</i>            | TAGACCAGGCCGTGGATG           | GTTTCCCGGCCATAGGAG             | ENSMUSG<br>00000032690 |
|               | <i>Hprt</i>            | GCTTGCTGGTGAAAAGGACCTCTCGAAG | CCCTGAAGTACTCATTATAGTCAAGGGCAT | ENSMUSG<br>00000025630 |
|               | <i>Tbp</i>             | CCTTGTAACCTTCACCAATGAC       | ACAGCCAAGATTCACGGTAGA          | ENSMUSG<br>00000014767 |
|               | <i>Ywhaz</i>           | GAAAAGTTCTTGATCCCCAATGC      | TGTGACTGGTCCACAATTCCTT         | ENSMUSG<br>00000022285 |
|               | <i>Actb</i>            | AGGCCAACCGTGAAAAGATG         | TGGATGGCTACGTACATGGC           | ENSMUSG<br>00000029580 |
|               | <i>Hmbs</i>            | ATGAGGGTGATTGAGTGGG          | TTGTCTCCCGTGGTGGACATA          | ENSMUSG<br>00000032126 |
|               | <i>Rpl13a</i>          | AGGGGCAGGTTCTGGTATTG         | TGTTGATGCCTTCACAGCGT           | ENSMUSG<br>00000074129 |
| <i>Ppia</i>   | CGCGTCTCCTTCGAGCTGTTTG | TGTAAAGTCACCACCCTGGCACAT     | ENSMUSG<br>00000071866         |                        |
| <i>18s</i>    | CGGCTACCACATCCAAGGAA   | AGCTGGAATTACCGCGGC           | ENSMUSG<br>00000119584         |                        |

**Supplementary Table 3.** Primer list
